# Supplementary figures and images for: Regulatory T cells suppress the formation of potent KLRK1 and IL-7R expressing effector CD8 T cells by limiting IL-2
Source: eLife journal article supplement (doi:10.7554/elife.79342), 2023-01-27

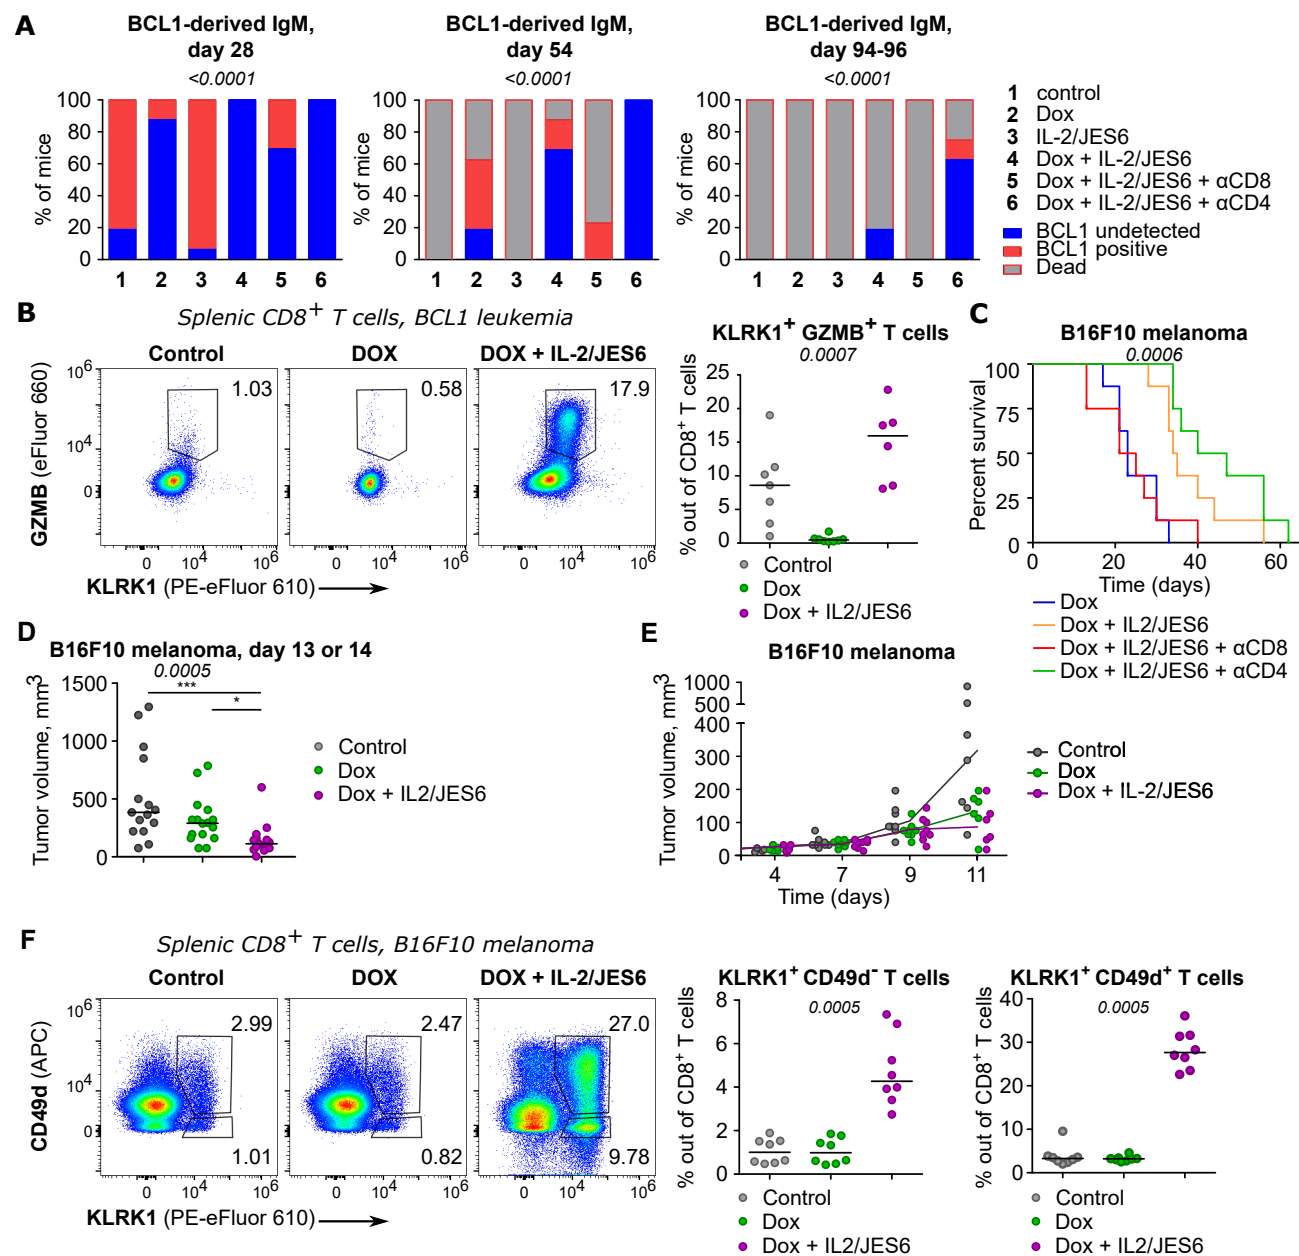

Supplement: supp [file elife-79342-supp-v1.zip]

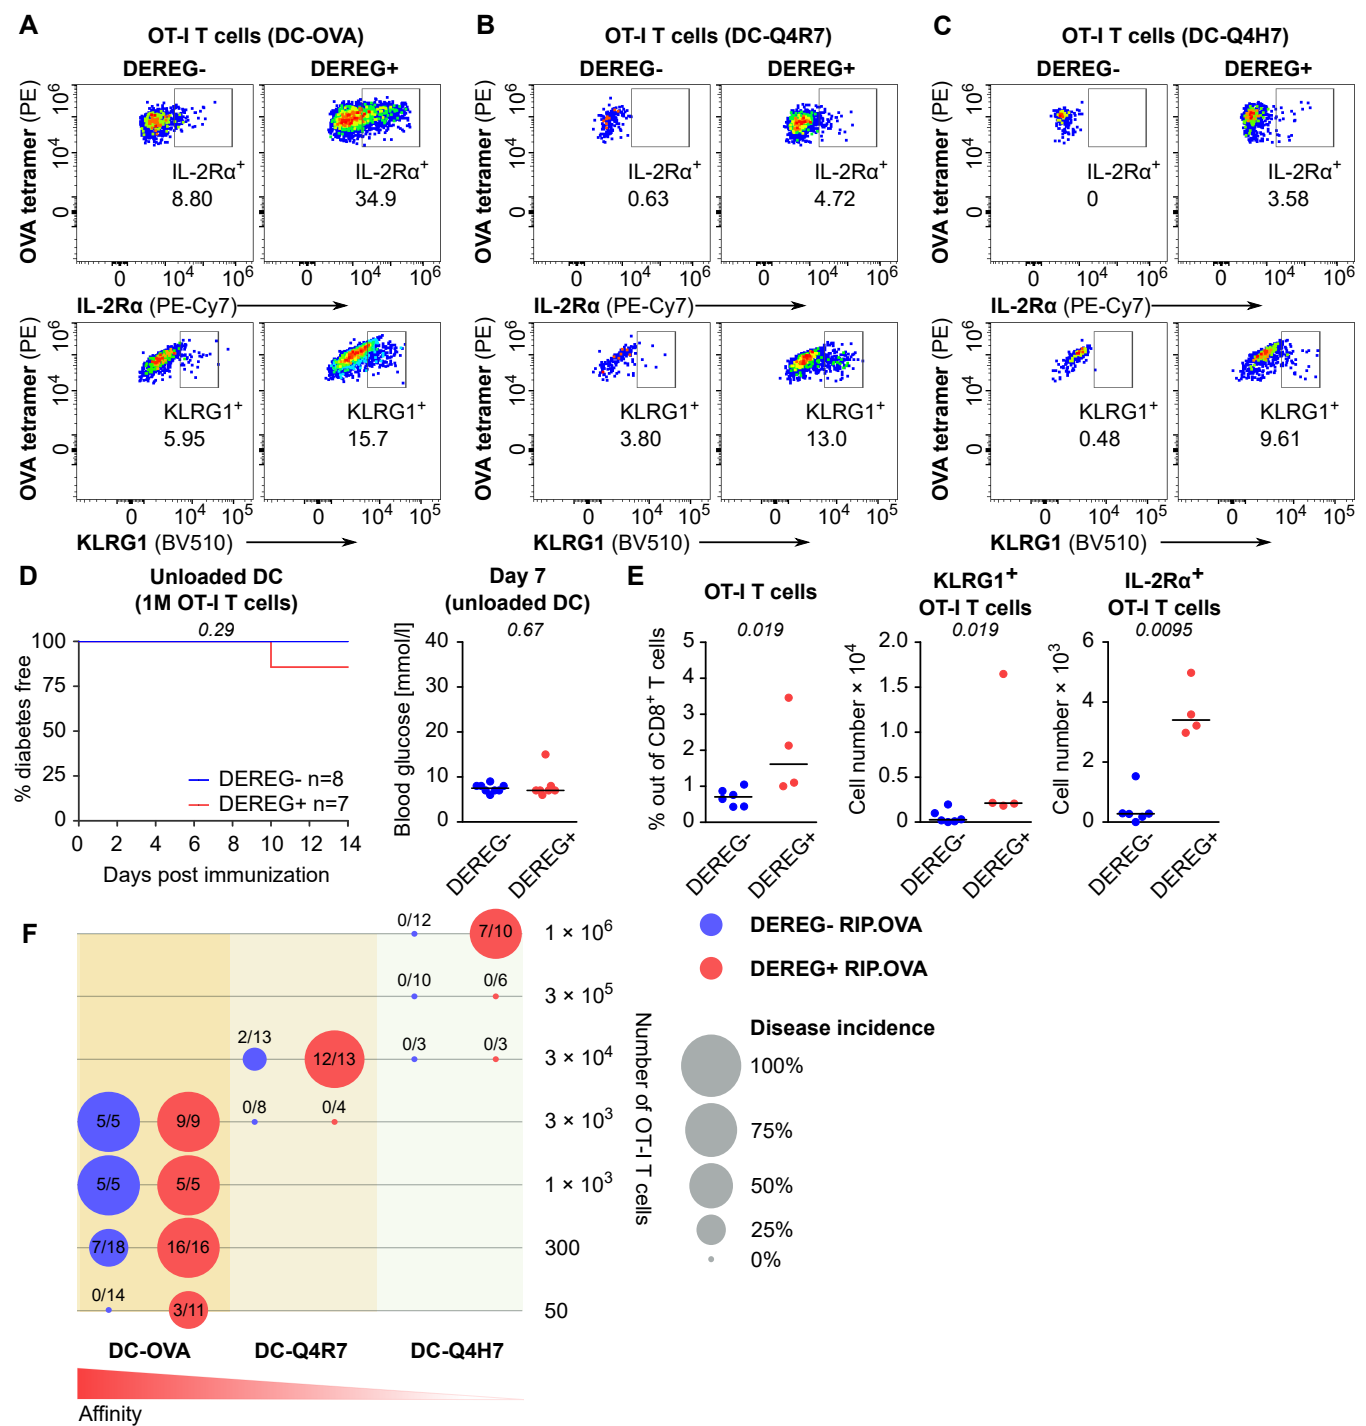

Supplement: supp [file elife-79342-supp-v1.zip]

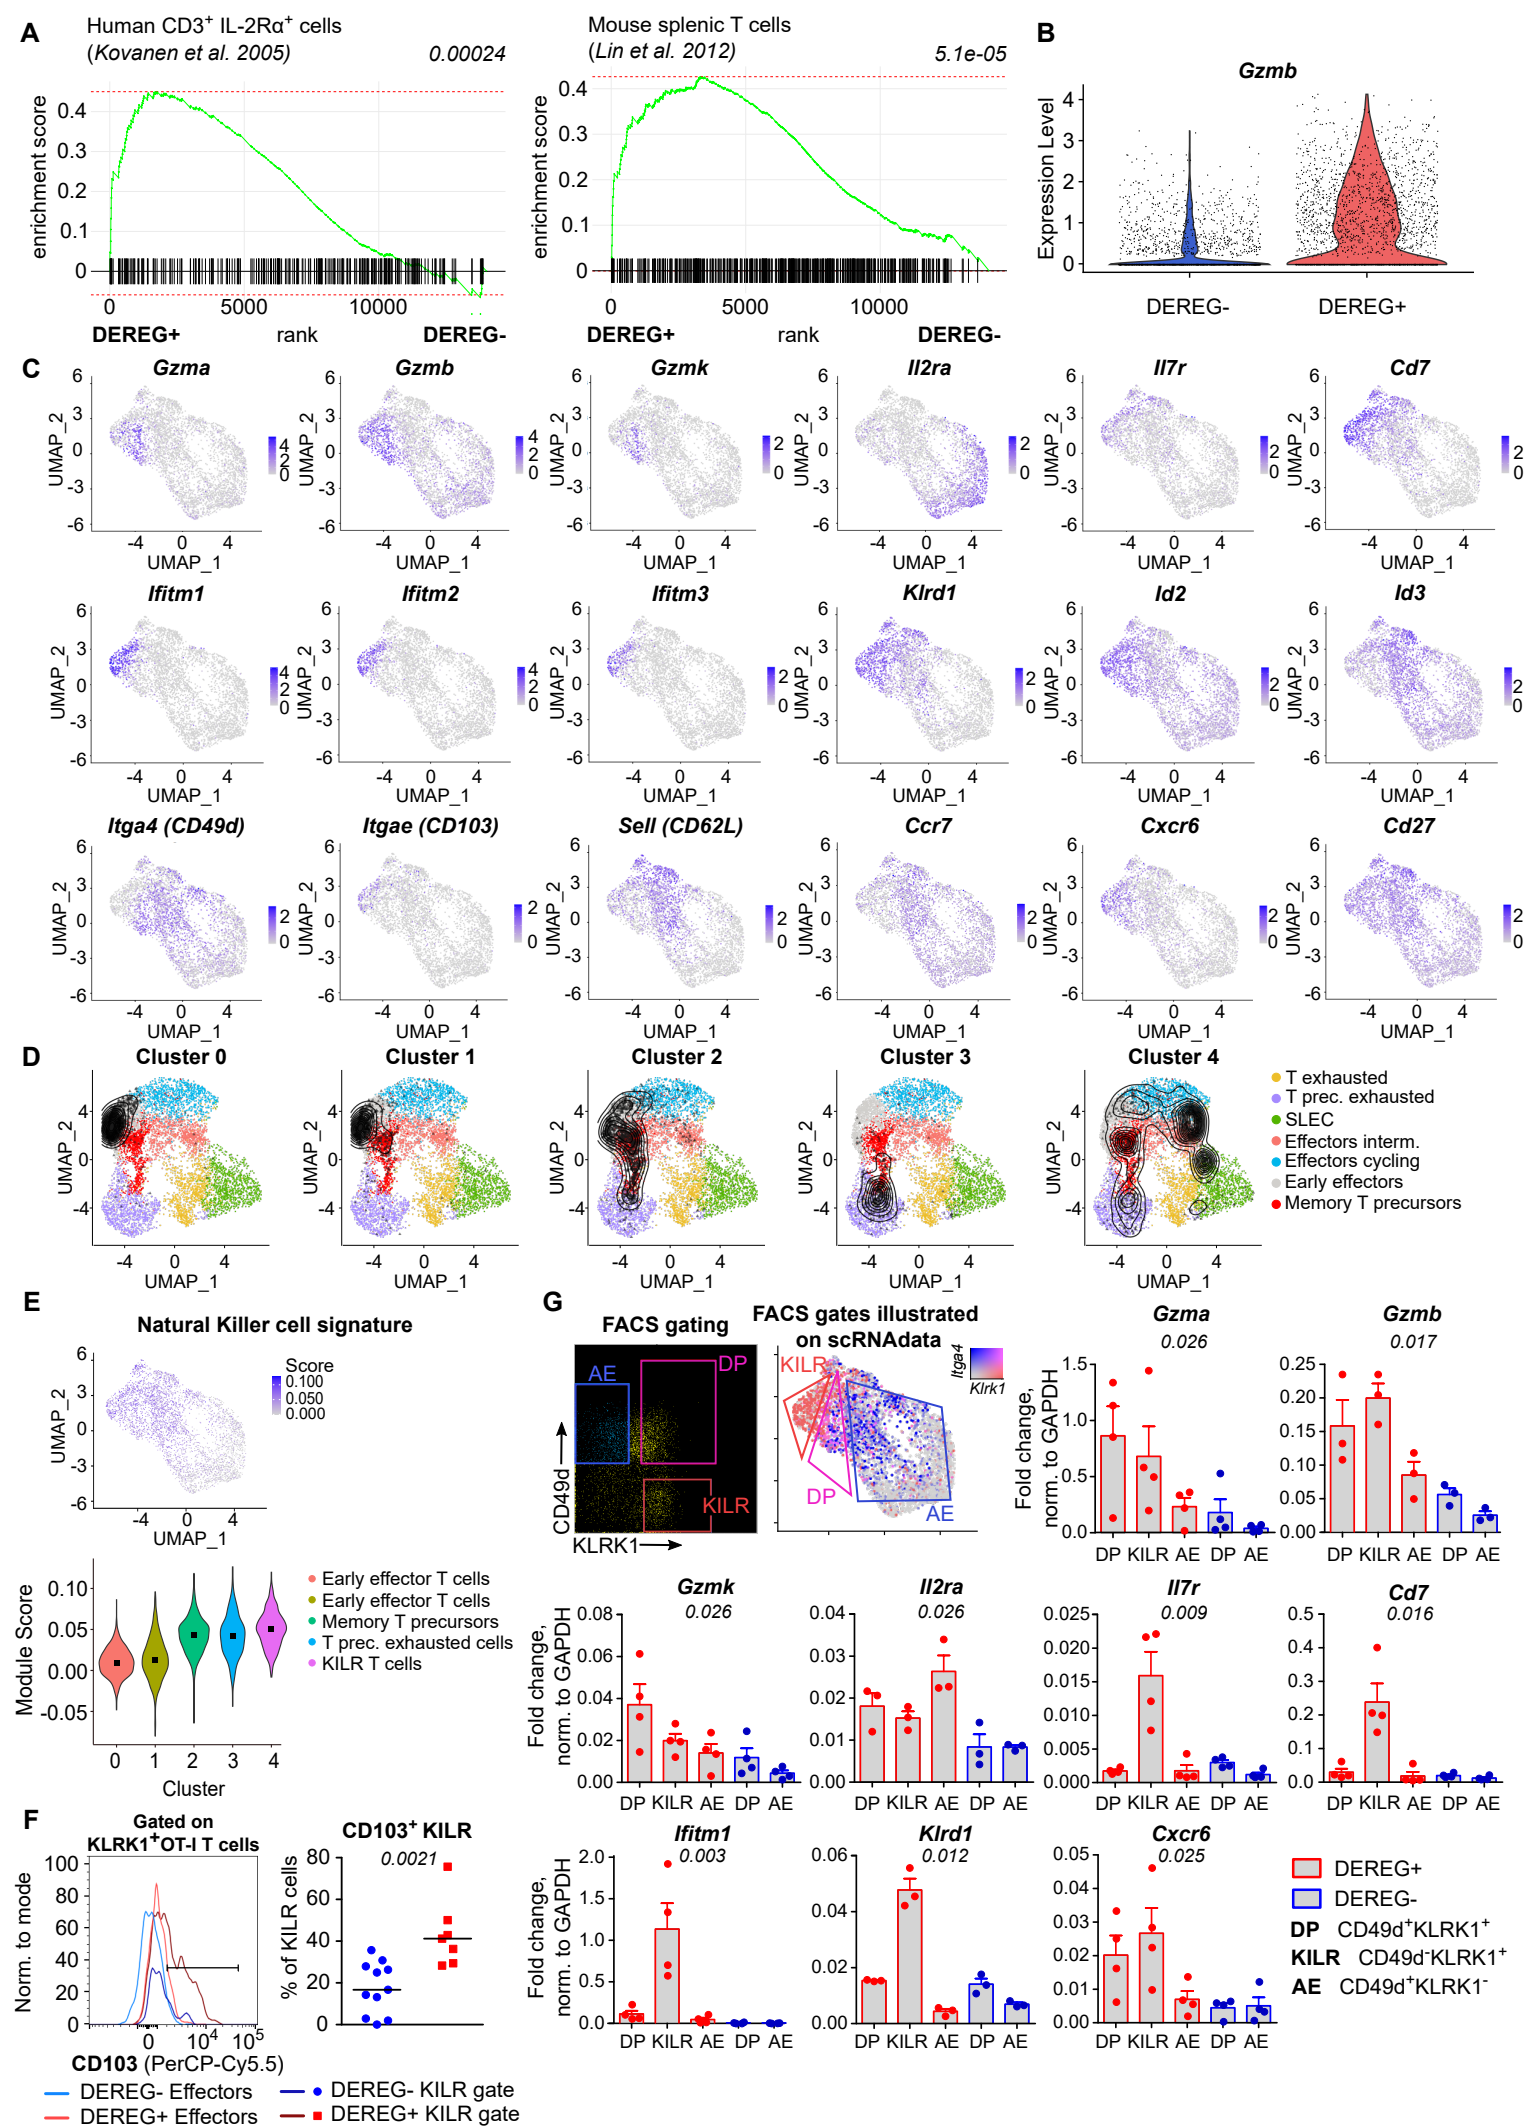

Supplement: supp [file elife-79342-supp-v1.zip]

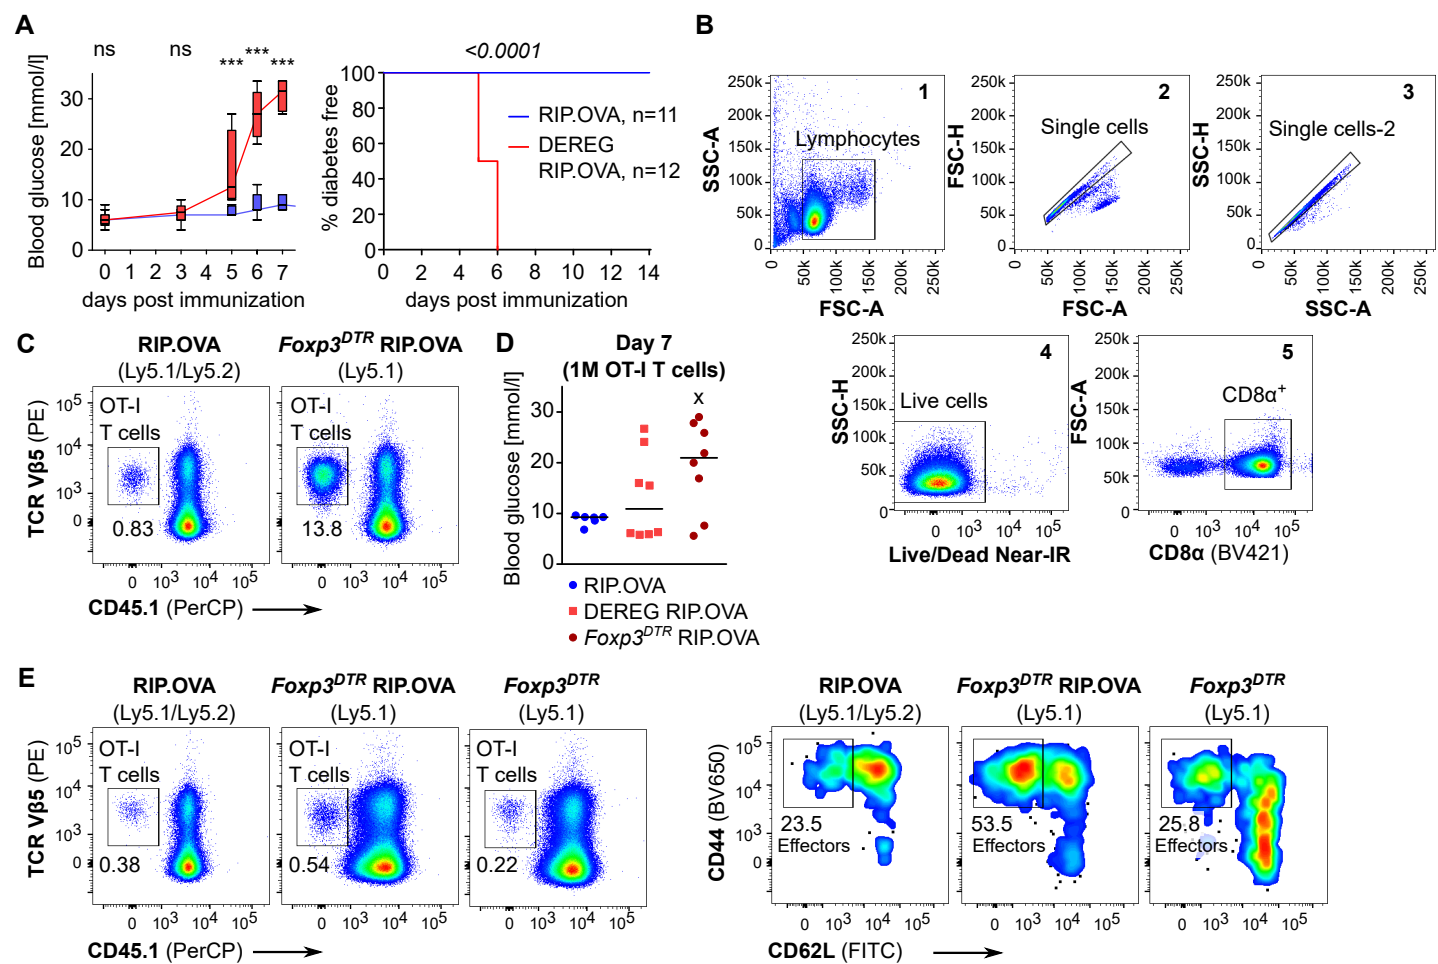

Supplement: supp [file elife-79342-supp-v1.zip]

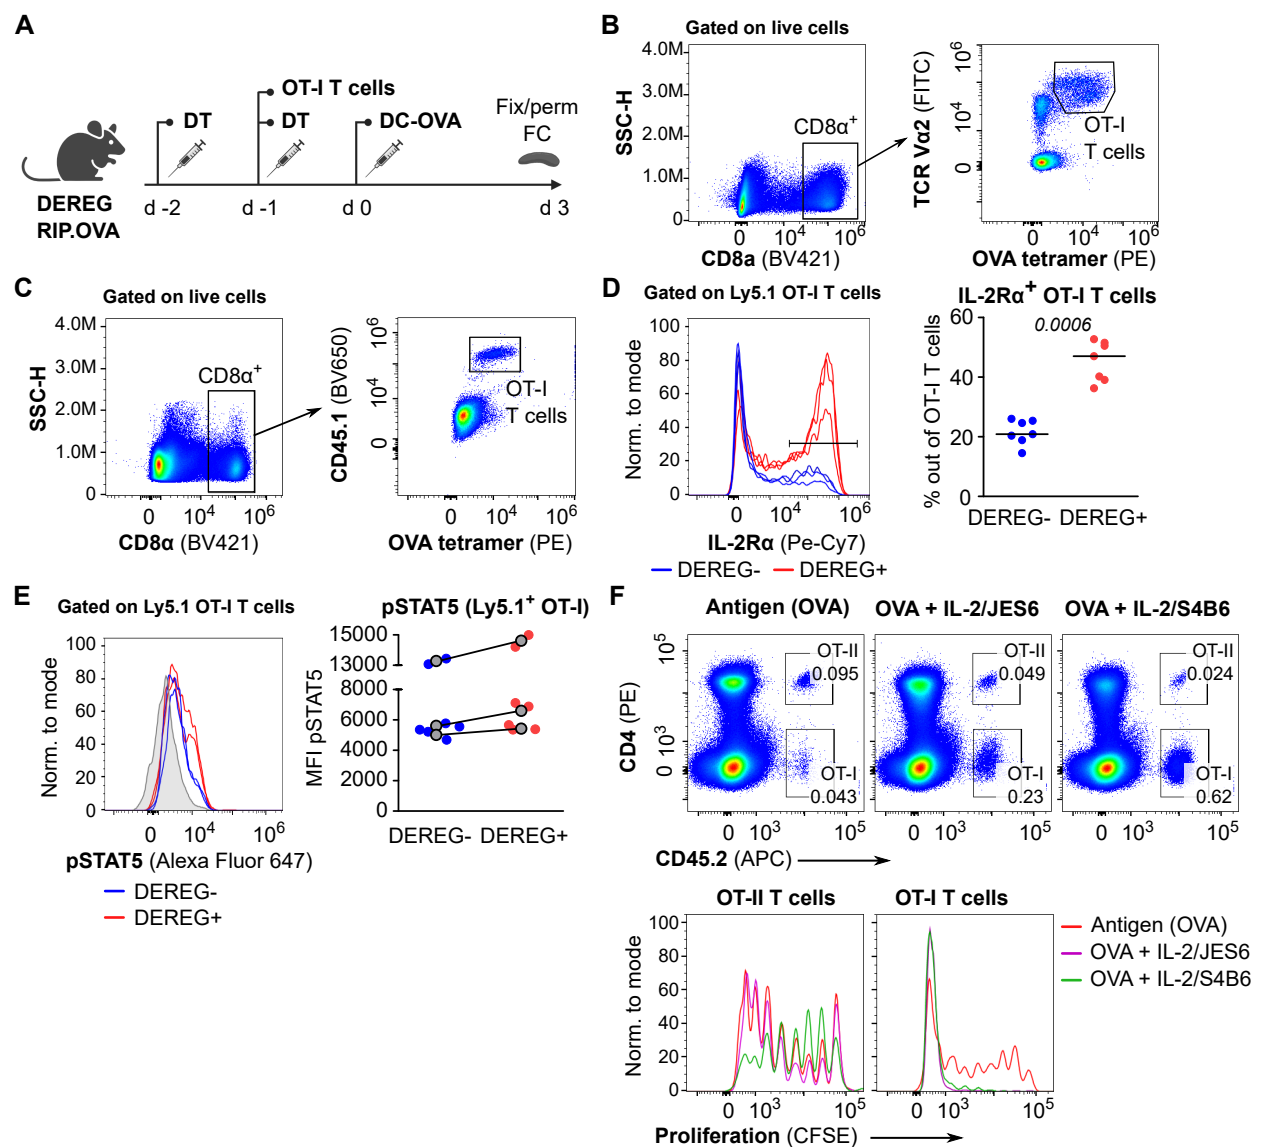

Supplement: supp [file elife-79342-supp-v1.zip]

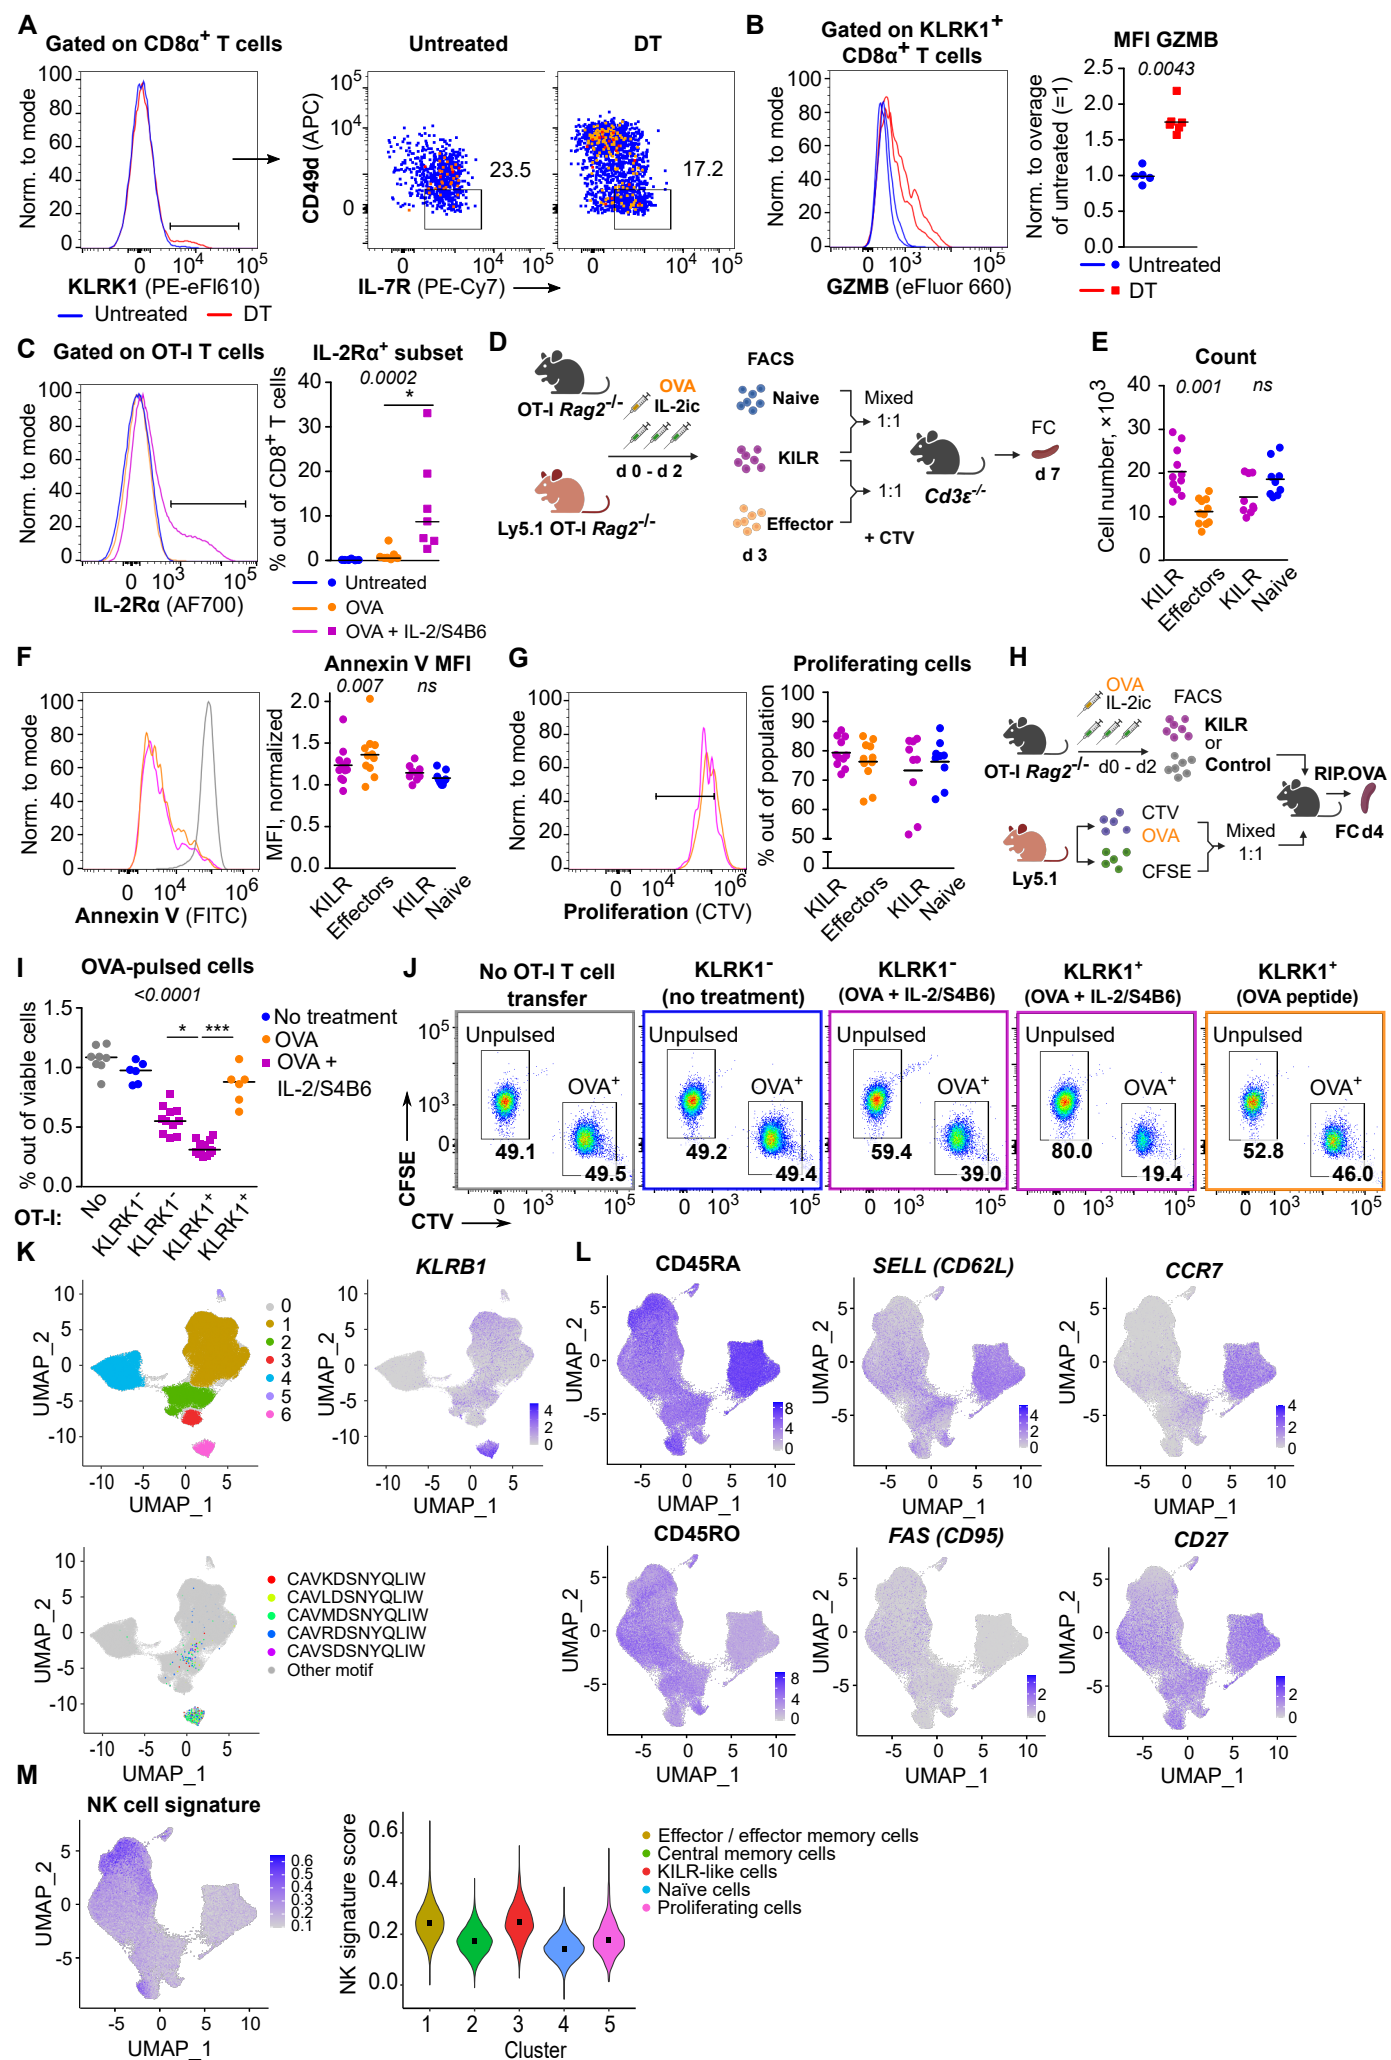

Supplement: supp [file elife-79342-supp-v1.zip]

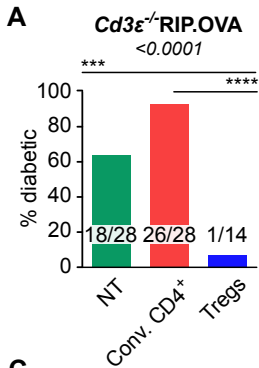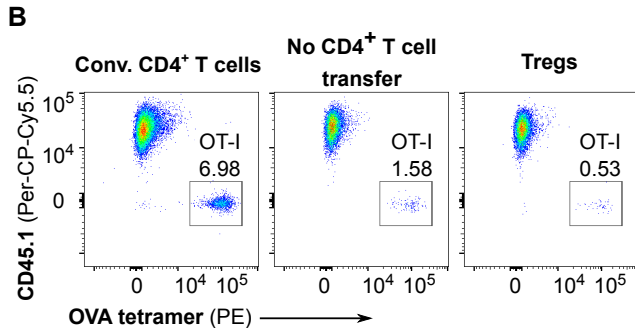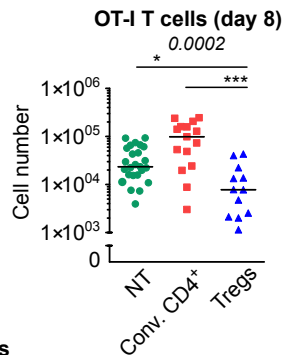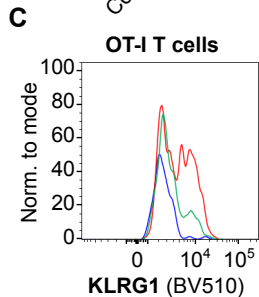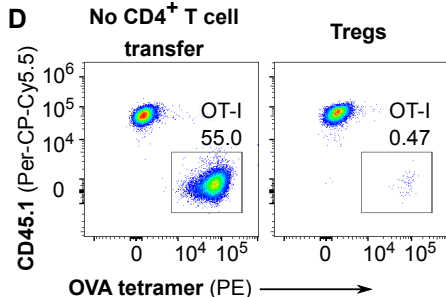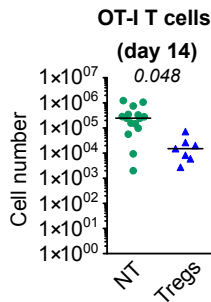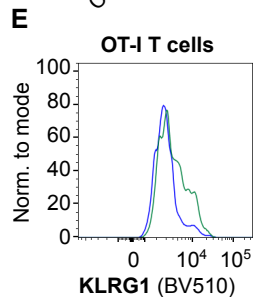

— No CD4<sup>+</sup> T cell transfer  
— Conv. CD4<sup>+</sup> T cells  
— Tregs

— No CD4<sup>+</sup> T cell transfer  
— Tregs

Supplement: supp [file elife-79342-supp-v1.zip]
